# Supplementary material for: Identification of Atuveciclib (BAY 1143572), the First Highly Selective, Clinical PTEFb/CDK9 Inhibitor for the Treatment of Cancer
Source: PubMed Central journal article supplement — ChemMedChem. 2017 Oct 16;12(21):1776–93. doi: 10.1002/cmdc.201700447 (PMC5698704; doi:10.1002/cmdc.201700447), 2017-10-16
Supplement: CMDC-12-1776-s001.pdf [file CMDC-12-1776-s001.pdf]

## Supporting Information

### **Identification of Atuveciclib (BAY 1143572), the First Highly Selective, Clinical PTEFb/CDK9 Inhibitor for the Treatment of Cancer**

Ulrich Lücking,<sup>\*,[a]</sup> Arne Scholz,<sup>[a]</sup> Philip Lienau,<sup>[a]</sup> Gerhard Siemeister,<sup>[a]</sup> Dirk Kosemund,<sup>[a]</sup> Rolf Bohlmann,<sup>[a]</sup> Hans Briem,<sup>[a]</sup> Ildiko Terebesi,<sup>[a]</sup> Kirstin Meyer,<sup>[a]</sup> Katja Prella,<sup>[a]</sup> Karsten Denner,<sup>[a]</sup> Ulf Bömer,<sup>[a]</sup> Martina Schäfer,<sup>[a]</sup> Knut Eis,<sup>[a]</sup> Ray Valencia,<sup>[a]</sup> Stuart Ince,<sup>[a]</sup> Franz von Nussbaum,<sup>[a]</sup> Dominik Mumberg,<sup>[a]</sup> Karl Ziegelbauer,<sup>[a]</sup> Bert Klebl,<sup>[b]</sup> Axel Choidas,<sup>[b]</sup> Peter Nussbaumer,<sup>[b]</sup> Matthias Baumann,<sup>[b]</sup> Carsten Schultz-Fademrecht,<sup>[b]</sup> Gerd Rührter,<sup>[b]</sup> Jan Eickhoff,<sup>[b]</sup> and Michael Brands<sup>[a]</sup>

cmdc\_201700447\_sm\_miscellaneous\_information.zip
